# Supplementary material
Source: Springer Nature journal article supplement (https://www.springermedizin.de/resource/supplementary/12990_2013_716_MOESM1_ESM.pdf/9612290)

**NPRA (LifeSpan)**

**NPRA (Abcam)**

**DRG**

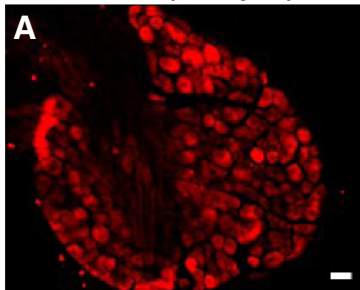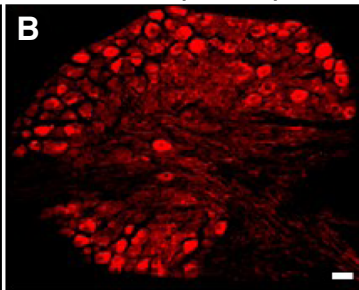

**Spinal cord**

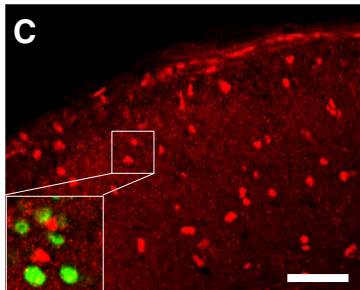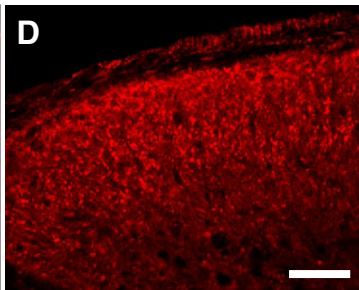

**BNP (LifeSpan)**

**BNP (Santa Cruz)**

**DRG**

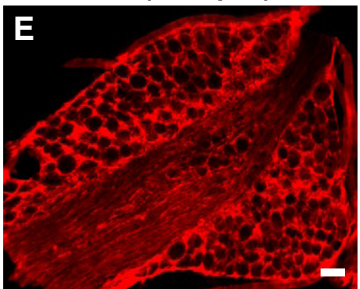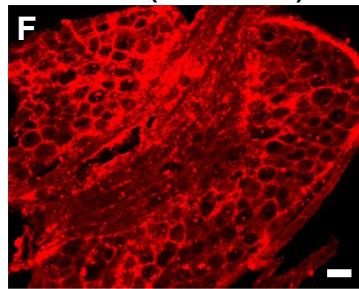

Supplement: MOESM1 [file 9612290]
